# Supplementary material for: Towards understanding the stability of the N5+-containing salts: the role of counterions
Source: Royal Society of Chemistry journal article supplement (doi:10.1039/c5ra16304h), 2015-01-01
Supplement: c5ra16304h1.pdf [file c5ra16304h1.pdf]

## Supporting information

Decomposition products

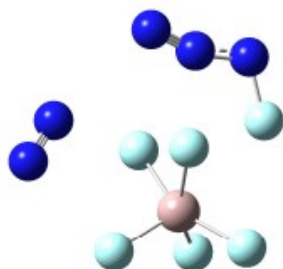

$N_5AlF_6$

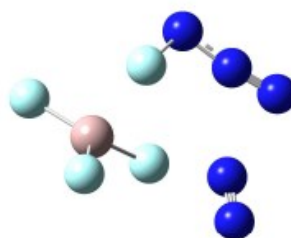

$N_5AlF_4$

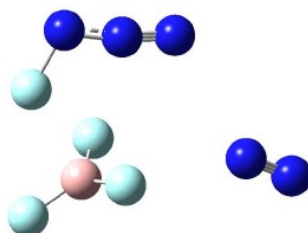

$N_5BF_4$

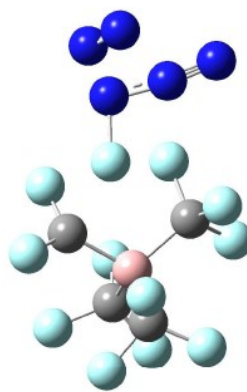

$N_5B(CF_3)_4$

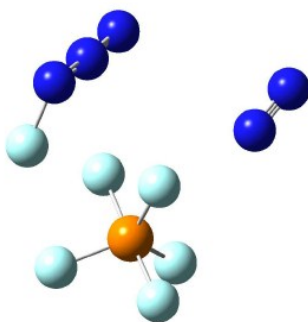

$N_5PF_6$

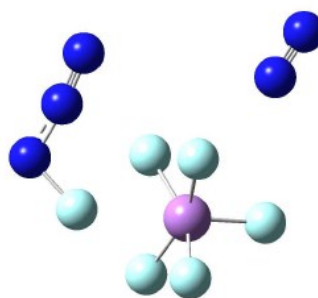

$N_5AsF_6$

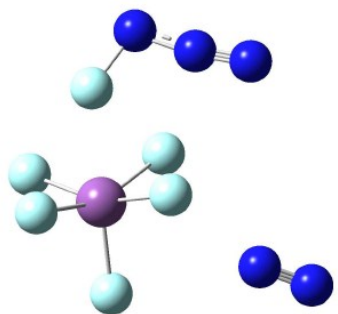

$\text{N}_5\text{SbF}_6$

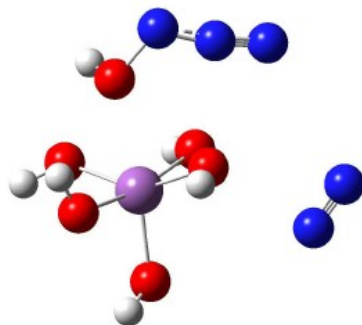

$\text{N}_5\text{Sb}(\text{OH})_6$
